# Supplementary material
Source: PubMed Central journal article supplement (PMC8420864)

Expression of RPTOR in CHOL based on Sample types

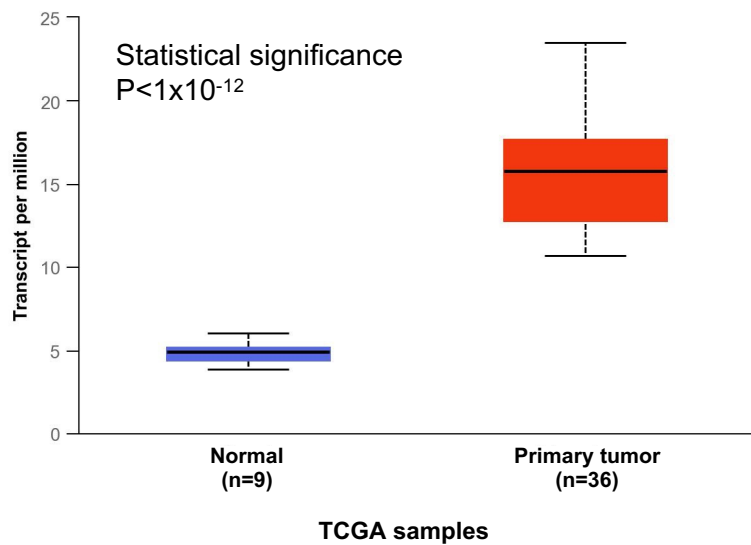

Expression of MLST8 in CHOL based on Sample types

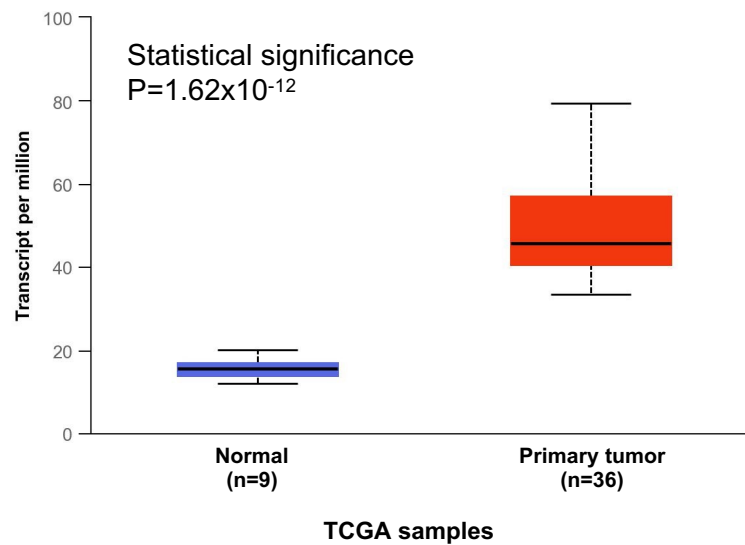

Expression of MTOR in CHOL based on Sample types

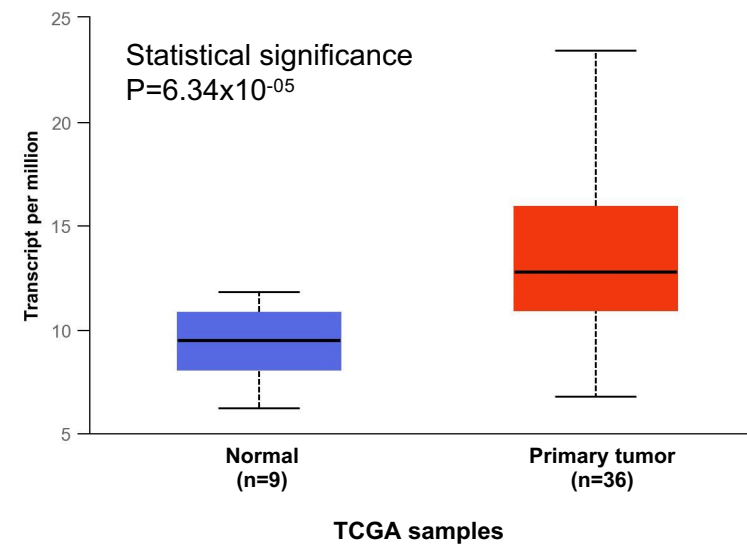

Supplement: mmc1.pdf [file mmc1.pdf]
